# Supplementary material
Source: PubMed Central journal article supplement (PMC1167546)
Supplement: plntcell_tpc.105.031096_5.pdf [file plntcell_tpc.105.031096_5.pdf]

**Supplemental Table 1. *GUS* reporter gene expression in wild type *Arabidopsis* seedlings treated with auxin (1-NAA) and/or brassinolide (BL).**

---

| Experiment | Mock | BL  | NAA | NAA+BL |
|------------|------|-----|-----|--------|
| I          | 110  | 147 | 425 | 625    |
| II         | 64   | 108 | 359 | 670    |

---

In two independent experiments (I and II), seven-day-old light grown *Arabidopsis* seedlings containing the *DR5:GUS* reporter gene were treated for 24 hour in 0.1% dimethylsulfoxide (DMSO), 0.1  $\mu$ M NAA, 0.1  $\mu$ M BL, or 0.1  $\mu$ M each of NAA and BL. Hormone solutions were diluted from stocks in DMSO so that the incubation solutions contained a concentration of 0.1% DMSO. Following incubation, seedlings were frozen in liquid nitrogen, extracted, and assayed for GUS activity.
