# Supplementary material
Source: PubMed Central journal article supplement (PMC1167546)

A

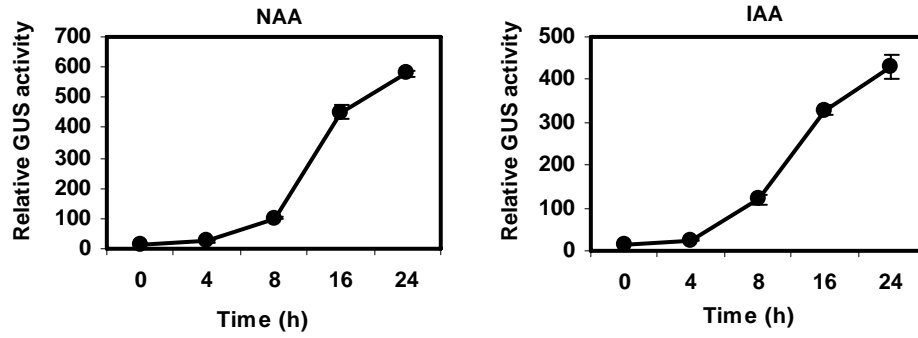

B

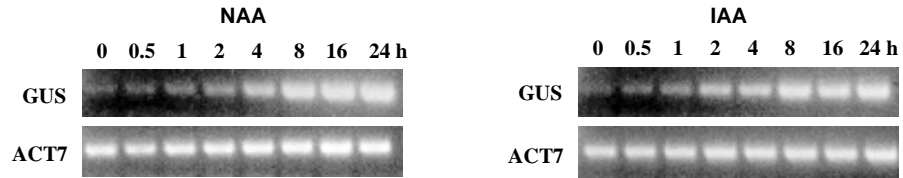

C

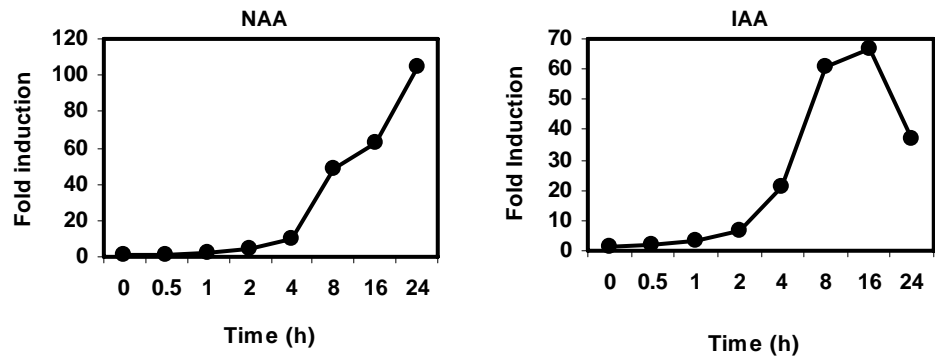

Supplemental Figure 1

Supplement: plntcell_tpc.105.031096_1.pdf [file plntcell_tpc.105.031096_1.pdf]

A

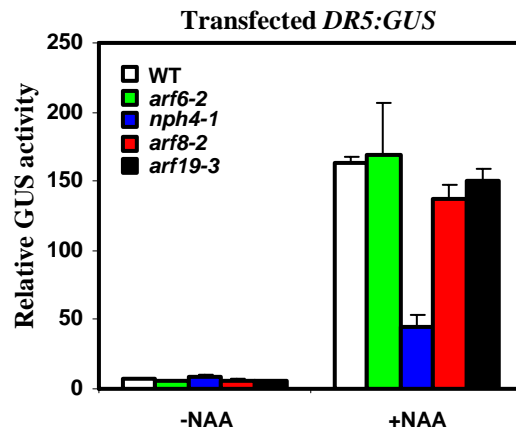

B

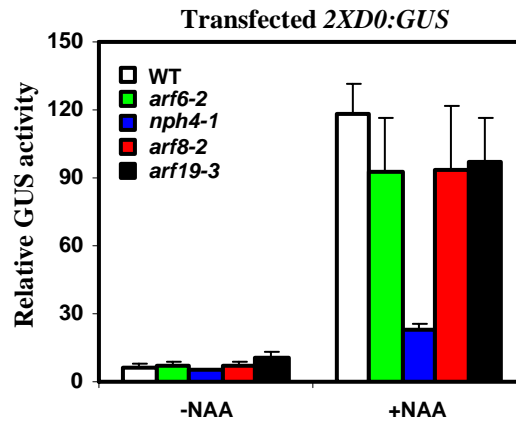

Supplemental Figure 2

Supplement: plntcell_tpc.105.031096_2.pdf [file plntcell_tpc.105.031096_2.pdf]

A

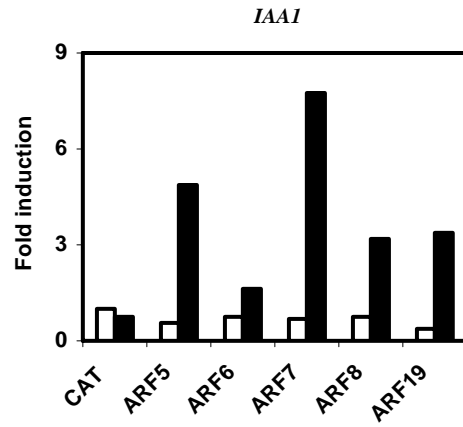

B

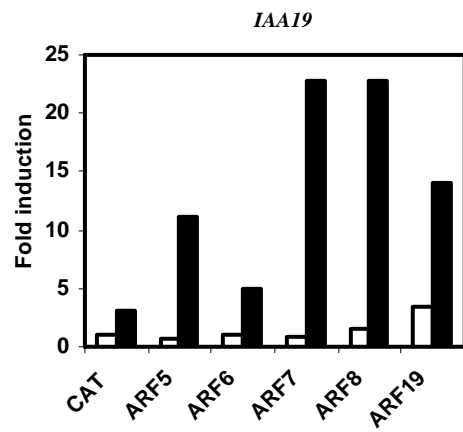

**Supplemental Figure 3**

Supplement: plntcell_tpc.105.031096_3.pdf [file plntcell_tpc.105.031096_3.pdf]

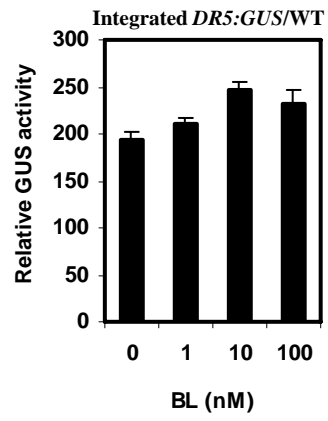

**Supplemental Figure 4**

Supplement: plntcell_tpc.105.031096_4.pdf [file plntcell_tpc.105.031096_4.pdf]
